# Supplementary material for: Genome-Wide Detection of Spontaneous Chromosomal Rearrangements in Bacteria
Source: PLoS One. 2012 Aug 3;7(8):e42639. doi: 10.1371/journal.pone.0042639 (PMC3411829; doi:10.1371/journal.pone.0042639)
Supplement: Table S1 — List of putative rearrangements with ‘split mapping’ signature. (XLSX) [file pone.0042639.s004.xlsx]

## Sheet: threedatasets_allputativerearra
Table S1. List of putative rearrangements with 'split mapping' signature.
Read Name	Dataset	Classification	Breakpoint1	Strand1	Breakpoint2	Strand2	Junction Homology(bp)	Size (bp)	No. Of Reads
GFLSN1V01CQ8BH	gen48	deletion	2221659	Plus/Minus	2221602	Plus/Minus	0	56	1
GFLSN1V02J02J3	gen48	deletion	60420	Plus/Plus	60681	Plus/Plus	0	260	1
GFLSN1V02JD06O	gen48	deletion	2975322	Plus/Plus	2975361	Plus/Plus	0	38	1
GFLSN1V02FZW9A	gen48	deletion	4194882	Plus/Plus	4195027	Plus/Plus	0	144	1
GFLSN1V02I88IJ	gen48	deletion	4568662	Plus/Plus	4568701	Plus/Plus	0	38	1
GFLSN1V02JFYNM	gen48	deletion	318783	Plus/Plus	318835	Plus/Plus	0	51	1
GFLSN1V02GD212	gen48	deletion	739233	Plus/Plus	739272	Plus/Plus	0	38	1
GFLSN1V01D6H46	gen48	deletion	3785604	Plus/Minus	3785403	Plus/Minus	1	201	1
GFLSN1V01DBBRA	gen48	deletion	4362907	Plus/Plus	4363516	Plus/Plus	1	609	1
GFLSN1V02HUKVU	gen48	deletion	3884746	Plus/Minus	3884595	Plus/Minus	1	151	1
GFLSN1V02F2UJG	gen48	deletion	1526256	Plus/Plus	1526382	Plus/Plus	1	126	1
GFLSN1V01BRP99	gen48	deletion	90277	Plus/Plus	91107	Plus/Plus	2	831	1
GFLSN1V01BGW8G	gen48	deletion	125207	Plus/Minus	125173	Plus/Minus	2	35	1
GFLSN1V02G6B0E	gen48	deletion	4256	Plus/Minus	4077	Plus/Minus	3	181	1
GFLSN1V02F72TK	gen48	deletion	4634047	Plus/Plus	4634073	Plus/Plus	3	28	1
GFLSN1V01CCM9Y	gen48	deletion	3674930	Plus/Minus	3674897	Plus/Minus	4	36	1
GFLSN1V02FE0WL	gen48	deletion	3272760	Plus/Minus	3272722	Plus/Minus	4	41	1
GFLSN1V01AYBG8	gen48	deletion	3674898	Plus/Plus	3674930	Plus/Plus	5	36	1
GFLSN1V01BH8B1	gen48	deletion	855886	Plus/Plus	856022	Plus/Plus	5	140	1
GFLSN1V01B3IN5	gen48	deletion	2668615	Plus/Plus	2668695	Plus/Plus	5	84	1
GFLSN1V02H3S9I	gen48	deletion	2197663	Plus/Minus	2197303	Plus/Minus	6	365	1
GFLSN1V01ATM5V	gen48	deletion	4434315	Plus/Minus	4434041	Plus/Minus	8	281	1
GFLSN1V01CDFB9	gen48	deletion	2518562	Plus/Minus	2518197	Plus/Minus	8	372	1
GFLSN1V01DNN3C	gen48	deletion	845002	Plus/Minus	844596	Plus/Minus	9	414	1
GFLSN1V01DJLGX	gen48	deletion	3969264	Plus/Minus	3968260	Plus/Minus	11	1014	1
GFLSN1V01DOBJK	gen48	deletion	3674934	Plus/Minus	3674908	Plus/Minus	12	37	2
GFLSN1V02GKAGX	gen48	deletion	1066705	Plus/Plus	1066955	Plus/Plus	12	261	1
GFLSN1V02H9636	gen48	deletion	4391619	Plus/Minus	4391241	Plus/Minus	13	390	1
GFLSN1V02JBE7P	gen48	deletion	2645402	Plus/Minus	2646114	Plus/Minus	15	726	1
GFLSN1V01BZFPJ	gen48	deletion	886477	Plus/Minus	885981	Plus/Minus	15	510	1
GFLSN1V01EEKH4	gen48	deletion	78669	Plus/Plus	79122	Plus/Plus	16	468	1
GFLSN1V02HCA7P	gen48	deletion	323023	Plus/Minus	322718	Plus/Minus	17	321	1
GFLSN1V01AK6D5	gen48	deletion	4489365	Plus/Plus	4490253	Plus/Plus	19	906	1
GFLSN1V02FLAH5	gen48	deletion	2629998	Plus/Minus	2629346	Plus/Minus	24	675	1
GFLSN1V01E0QZI	gen48	deletion	3754425	Plus/Plus	3755179	Plus/Plus	28	781	1
GFLSN1V01DJFOY	gen48	deletion	2637406	Plus/Minus	2636531	Plus/Minus	32	906	1
GFLSN1V01A7KE5	gen48	deletion	2674679	Plus/Minus	2673807	Plus/Minus	44	915	1
GFLSN1V01E44E9	gen48	deletion	179054	Plus/Plus	179617	Plus/Plus	50	612	1
GFLSN1V01CSMWY	gen48	deletion	4486821	Plus/Minus	4486276	Plus/Minus	53	597	1
GFLSN1V01AUOOQ	gen48	deletion	179041	Plus/Plus	179288	Plus/Plus	63	309	1
GFLSN1V02FX6DH	gen48	deletion	337442	Plus/Plus	339784	Plus/Plus	64	2405	1
GFLSN1V02JG15X	gen48	deletion	819064	Plus/Minus	818855	Plus/Minus	78	286	2
GFLSN1V02GV9LY	gen48	deletion	2970274	Plus/Plus	2970335	Plus/Plus	79	139	1
GFLSN1V01B9VTY	gen48	deletion	3141141	Plus/Plus	3141165	Plus/Plus	83	106	1
GFLSN1V02JJGI4	gen48	deletion	3883660	Plus/Minus	3883275	Plus/Minus	102	486	2
GFLSN1V01C22ZK	gen48	deletion	4489332	Plus/Plus	4489755	Plus/Plus	178	600	1
GFLSN1V01BM0J1	gen48	duplication	3320352	Plus/Minus	957684	Plus/Minus	0	2494764	1
GFLSN1V01CFMUA	gen48	duplication	3890561	Plus/Plus	2731	Plus/Plus	0	3887830	1
GFLSN1V01DCRLH	gen48	duplication	14882	Plus/Minus	4696670	Plus/Minus	0	4681788	1
GFLSN1V01DR60P	gen48	duplication	3783346	Plus/Plus	884591	Plus/Plus	0	2898755	1
GFLSN1V01ELE83	gen48	duplication	703482	Plus/Minus	4812166	Plus/Minus	0	4108684	1
GFLSN1V01EP32N	gen48	duplication	3243198	Plus/Plus	1193323	Plus/Plus	0	2049875	1
GFLSN1V01BY1LY	gen48	duplication	153440	Plus/Plus	321775	Plus/Plus	0	4689097	1
GFLSN1V01A2PBE	gen48	duplication	3933374	Plus/Plus	1581276	Plus/Plus	0	2352098	1
GFLSN1V01ADGJN	gen48	duplication	4662756	Plus/Minus	1466206	Plus/Minus	0	1660882	1
GFLSN1V01CTG7U	gen48	duplication	4491982	Plus/Plus	935872	Plus/Plus	0	3556110	1
GFLSN1V01AMZYR	gen48	duplication	349833	Plus/Plus	3049557	Plus/Plus	0	2157708	1
GFLSN1V01DABNH	gen48	duplication	891993	Plus/Minus	3898755	Plus/Minus	0	3006762	1
GFLSN1V01BR88L	gen48	duplication	4500606	Plus/Minus	2028496	Plus/Minus	0	2385322	1
GFLSN1V01AMV23	gen48	duplication	333119	Plus/Plus	3496034	Plus/Plus	0	1694517	1
GFLSN1V02H7I0D	gen48	duplication	3026744	Plus/Minus	3378148	Plus/Minus	0	351404	1
GFLSN1V02JV0RG	gen48	duplication	2913295	Plus/Minus	4710476	Plus/Minus	0	1797181	1
GFLSN1V02GUUGD	gen48	duplication	245427	Plus/Plus	4571216	Plus/Plus	0	531643	1
GFLSN1V02IQI28	gen48	duplication	556180	Plus/Plus	707304	Plus/Plus	0	4706308	1
GFLSN1V02IRAA5	gen48	duplication	3348747	Plus/Plus	3323789	Plus/Plus	0	24958	1
GFLSN1V02G2FZK	gen48	duplication	2721139	Plus/Minus	3487316	Plus/Minus	0	766177	1
GFLSN1V02HW996	gen48	duplication	3192923	Plus/Minus	442357	Plus/Minus	0	2106866	1
GFLSN1V02J4EYS	gen48	duplication	2994302	Plus/Plus	2032098	Plus/Plus	0	962204	1
GFLSN1V02H3QO6	gen48	duplication	4536136	Plus/Plus	3652478	Plus/Plus	0	883658	1
GFLSN1V02FU15J	gen48	duplication	3694024	Plus/Plus	1469030	Plus/Plus	0	2224994	1
GFLSN1V02JUD2Q	gen48	duplication	4317368	Plus/Minus	3395785	Plus/Minus	0	3935849	1
GFLSN1V02I0H5J	gen48	duplication	2087931	Plus/Minus	4100060	Plus/Minus	0	2012129	1
GFLSN1V02IW3E1	gen48	duplication	683976	Plus/Minus	3540600	Plus/Minus	0	2856624	1
GFLSN1V02HYNXT	gen48	duplication	2764388	Plus/Plus	546995	Plus/Plus	0	2217393	1
GFLSN1V02GMZCH	gen48	duplication	2834451	Plus/Minus	504996	Plus/Minus	0	2527977	1
GFLSN1V01B2NCF	gen48	duplication	1116254	Plus/Plus	1696015	Plus/Plus	1	4277671	1
GFLSN1V01BRSXP	gen48	duplication	3600527	Plus/Plus	4576068	Plus/Plus	1	3881891	1
GFLSN1V01EBD5W	gen48	duplication	2527469	Plus/Plus	2548506	Plus/Plus	1	4836395	1
GFLSN1V01BE92F	gen48	duplication	2458536	Plus/Minus	62068	Plus/Minus	1	2460964	1
GFLSN1V01COGBC	gen48	duplication	1257839	Plus/Minus	3708874	Plus/Minus	1	2451035	1
GFLSN1V01BY2QJ	gen48	duplication	830703	Plus/Plus	3944268	Plus/Plus	1	1743867	1
GFLSN1V02JOU5U	gen48	duplication	25613	Plus/Plus	1243931	Plus/Plus	1	3639114	1
GFLSN1V02HPFJK	gen48	duplication	4310582	Plus/Minus	3467832	Plus/Minus	1	4014682	1
GFLSN1V02HHB0G	gen48	duplication	4791465	Plus/Minus	4480777	Plus/Minus	1	4546744	1
GFLSN1V02FIQJA	gen48	duplication	4634773	Plus/Plus	793823	Plus/Plus	1	3840950	1
GFLSN1V02HQ0H2	gen48	duplication	3203085	Plus/Minus	3003938	Plus/Minus	1	4658285	1
GFLSN1V02FL3E4	gen48	duplication	4756518	Plus/Minus	3051396	Plus/Minus	1	3152310	1
GFLSN1V02GKRGK	gen48	duplication	4837563	Plus/Minus	3998327	Plus/Minus	1	4018196	1
GFLSN1V02H4K52	gen48	duplication	4469022	Plus/Plus	2233811	Plus/Plus	1	2235211	1
GFLSN1V02GTRDE	gen48	duplication	2523731	Plus/Minus	4800439	Plus/Minus	1	2276708	1
GFLSN1V02GXLKR	gen48	duplication	3230259	Plus/Plus	2411302	Plus/Plus	1	818957	1
GFLSN1V01AUBX7	gen48	duplication	2835727	Plus/Plus	3959046	Plus/Plus	2	3734113	1
GFLSN1V01CTIEH	gen48	duplication	3129091	Plus/Minus	4404174	Plus/Minus	2	1275083	1
GFLSN1V02F0322	gen48	duplication	2996842	Plus/Plus	3038229	Plus/Plus	2	4816045	1
GFLSN1V02IHNKY	gen48	duplication	4204992	Plus/Plus	4830967	Plus/Plus	2	4231457	1
GFLSN1V02G3Z0F	gen48	duplication	562696	Plus/Plus	3559658	Plus/Plus	2	1860470	1
GFLSN1V02I36A4	gen48	duplication	810953	Plus/Plus	873885	Plus/Plus	2	4794500	1
GFLSN1V02GE0AZ	gen48	duplication	4758084	Plus/Plus	4845735	Plus/Plus	3	4769781	1
GFLSN1V01ANYCW	gen48	duplication	4645443	Plus/Minus	4358104	Plus/Minus	4	4570093	1
GFLSN1V02JTAIG	gen48	duplication	3271097	Plus/Plus	914455	Plus/Plus	4	2356642	1
GFLSN1V02JR3D5	gen48	duplication	4804417	Plus/Minus	3371352	Plus/Minus	4	3424367	1
GFLSN1V02G1W38	gen48	duplication	4557868	Plus/Minus	1999137	Plus/Minus	4	2298701	1
GFLSN1V02J3X1D	gen48	duplication	3159328	Plus/Minus	3386365	Plus/Minus	5	227037	1
GFLSN1V02HJL8U	gen48	duplication	4798136	Plus/Plus	4350584	Plus/Plus	5	447552	1
GFLSN1V01C3QCE	gen48	duplication	2641347	Plus/Minus	4445615	Plus/Minus	6	1804268	1
GFLSN1V01DPJDY	gen48	duplication	1951335	Plus/Plus	625640	Plus/Plus	6	1325695	1
GFLSN1V01E4KKC	gen48	duplication	4001486	Plus/Minus	2460023	Plus/Minus	6	3315969	1
GFLSN1V02HKFAA	gen48	duplication	1733038	Plus/Minus	4134156	Plus/Minus	6	2401118	1
GFLSN1V01EIE4D	gen48	duplication	3992400	Plus/Minus	423906	Plus/Minus	7	1288938	1
GFLSN1V01B2SZN	gen48	duplication	2123215	Plus/Minus	4485948	Plus/Minus	7	2362733	1
GFLSN1V01DK3X9	gen48	duplication	3948548	Plus/Minus	546151	Plus/Minus	7	1455035	1
GFLSN1V02I14FW	gen48	duplication	3943928	Plus/Minus	3085101	Plus/Minus	7	3998605	1
GFLSN1V02JWRJJ	gen48	duplication	4347133	Plus/Plus	4335704	Plus/Plus	7	11429	1
GFLSN1V02JH4Y8	gen48	duplication	3945113	Plus/Minus	3988371	Plus/Minus	7	43258	1
GFLSN1V02J6HQQ	gen48	duplication	2764676	Plus/Minus	3390552	Plus/Minus	7	625876	1
GFLSN1V02HAT9D	gen48	duplication	3636865	Plus/Plus	4233358	Plus/Plus	7	4260939	1
GFLSN1V02JWNAF	gen48	duplication	4801173	Plus/Plus	4853894	Plus/Plus	8	4804711	1
GFLSN1V02GG02N	gen48	duplication	478593	Plus/Plus	4006326	Plus/Plus	8	1329699	1
GFLSN1V02JDL3E	gen48	duplication	4339919	Plus/Plus	235162	Plus/Plus	9	4104757	1
GFLSN1V02GCD8B	gen48	duplication	3611654	Plus/Minus	3840733	Plus/Minus	9	229079	1
GFLSN1V02HXNHZ	gen48	duplication	1187489	Plus/Plus	2617438	Plus/Plus	9	3427483	1
GFLSN1V01CSBOT	gen48	duplication	3069295	Plus/Minus	680765	Plus/Minus	10	2468902	1
GFLSN1V01BUPGB	gen48	duplication	4384020	Plus/Minus	4670142	Plus/Minus	10	286122	1
GFLSN1V01BCZQP	gen48	duplication	742000	Plus/Plus	2923623	Plus/Plus	10	2675809	1
GFLSN1V01CBH8U	gen48	duplication	2787963	Plus/Minus	3962438	Plus/Minus	11	1174475	1
GFLSN1V01DTGOJ	gen48	duplication	239282	Plus/Plus	527868	Plus/Plus	11	4568846	1
GFLSN1V02GGW6W	gen48	duplication	2396697	Plus/Minus	4555639	Plus/Minus	11	2158942	1
GFLSN1V02IGVNQ	gen48	duplication	517657	Plus/Plus	1946227	Plus/Plus	11	3428862	1
GFLSN1V02IGMQT	gen48	duplication	4725127	Plus/Minus	4261652	Plus/Minus	13	4393957	1
GFLSN1V02HDBTO	gen48	duplication	3858593	Plus/Minus	3939063	Plus/Minus	13	80470	1
GFLSN1V02GU4TO	gen48	duplication	1447890	Plus/Plus	519373	Plus/Plus	14	928517	1
GFLSN1V02IPGBJ	gen48	duplication	4227897	Plus/Plus	696755	Plus/Plus	14	3531142	1
GFLSN1V01AYJSO	gen48	duplication	1940880	Plus/Plus	2200364	Plus/Plus	15	4597948	1
GFLSN1V02FS66Y	gen48	duplication	4186264	Plus/Minus	1892071	Plus/Minus	16	2563239	1
GFLSN1V02JRTIW	gen48	duplication	3336889	Plus/Plus	92075	Plus/Plus	17	3244814	1
GFLSN1V02IASJO	gen48	duplication	1198756	Plus/Plus	3918194	Plus/Plus	27	2137994	1
GFLSN1V01DVPKS	gen48	inversion	1821169	Plus/Plus	4449466	Plus/Minus	0	2628297	1
GFLSN1V01DDKJ0	gen48	inversion	3878315	Plus/Plus	4443074	Plus/Minus	0	564759	1
GFLSN1V01BHQWQ	gen48	inversion	473000	Plus/Plus	2435364	Plus/Minus	0	1962364	1
GFLSN1V01A2QWD	gen48	inversion	2817610	Plus/Minus	3695650	Plus/Plus	0	878040	1
GFLSN1V01DU29I	gen48	inversion	3360640	Plus/Plus	42596	Plus/Minus	0	3318044	1
GFLSN1V01B73EC	gen48	inversion	3182763	Plus/Minus	2298127	Plus/Plus	0	884636	1
GFLSN1V01A2QLB	gen48	inversion	4385539	Plus/Minus	4433433	Plus/Plus	0	47894	1
GFLSN1V01DL1FP	gen48	inversion	1512880	Plus/Minus	1489263	Plus/Plus	0	23617	1
GFLSN1V01CUU4B	gen48	inversion	203304	Plus/Plus	3838407	Plus/Minus	0	3635103	1
GFLSN1V01CMC5W	gen48	inversion	2879155	Plus/Plus	2879212	Plus/Minus	0	57	1
GFLSN1V02HDOUL	gen48	inversion	1944533	Plus/Minus	3444015	Plus/Plus	0	1499482	1
GFLSN1V02HX1IW	gen48	inversion	342590	Plus/Plus	4404648	Plus/Minus	0	4062058	1
GFLSN1V02F1SHF	gen48	inversion	3142526	Plus/Minus	1691793	Plus/Plus	0	1450733	1
GFLSN1V02GBCO2	gen48	inversion	3007295	Plus/Plus	2244669	Plus/Minus	0	762626	1
GFLSN1V02IJH1W	gen48	inversion	21540	Plus/Minus	2693422	Plus/Plus	0	2671882	1
GFLSN1V02HKTLN	gen48	inversion	3157698	Plus/Minus	1012913	Plus/Plus	0	2144785	1
GFLSN1V02FJXI4	gen48	inversion	4415680	Plus/Minus	97211	Plus/Plus	0	4318469	1
GFLSN1V02F8533	gen48	inversion	1262002	Plus/Minus	2609167	Plus/Plus	0	1347165	1
GFLSN1V02I2T7U	gen48	inversion	636264	Plus/Plus	1263608	Plus/Minus	0	627344	1
GFLSN1V02HYG27	gen48	inversion	3939183	Plus/Minus	442825	Plus/Plus	0	3496358	1
GFLSN1V01BM367	gen48	inversion	1565870	Plus/Minus	3888795	Plus/Plus	1	2322925	1
GFLSN1V01BZB1B	gen48	inversion	2681226	Plus/Plus	3302117	Plus/Minus	1	620891	1
GFLSN1V01CBG6H	gen48	inversion	3006380	Plus/Plus	2683080	Plus/Minus	1	323300	1
GFLSN1V01D37XZ	gen48	inversion	4630293	Plus/Plus	3756243	Plus/Minus	1	874050	1
GFLSN1V01DXT66	gen48	inversion	4361431	Plus/Plus	500345	Plus/Minus	1	3861086	1
GFLSN1V01BOBE9	gen48	inversion	3941677	Plus/Plus	220113	Plus/Minus	1	3721564	1
GFLSN1V01AUGLI	gen48	inversion	1814226	Plus/Plus	478246	Plus/Minus	1	1335980	1
GFLSN1V02GVFVB	gen48	inversion	4480798	Plus/Minus	3526138	Plus/Plus	1	954660	1
GFLSN1V02JDSPH	gen48	inversion	3794323	Plus/Minus	387931	Plus/Plus	1	3406392	1
GFLSN1V02FIAAD	gen48	inversion	3377874	Plus/Plus	3943097	Plus/Minus	1	565223	1
GFLSN1V02FLK2G	gen48	inversion	1375492	Plus/Minus	3917054	Plus/Plus	1	2541562	1
GFLSN1V02GRVDU	gen48	inversion	4648500	Plus/Plus	4716773	Plus/Minus	1	68273	1
GFLSN1V02IOYAD	gen48	inversion	3134195	Plus/Minus	4225801	Plus/Plus	1	1091606	1
GFLSN1V02FXE7G	gen48	inversion	3759704	Plus/Plus	220814	Plus/Minus	1	3538890	1
GFLSN1V02HHUG2	gen48	inversion	2618925	Plus/Plus	3032915	Plus/Minus	1	413990	1
GFLSN1V02IOBGX	gen48	inversion	368478	Plus/Minus	4274377	Plus/Plus	1	3905899	1
GFLSN1V01D3MKG	gen48	inversion	2336389	Plus/Plus	3726984	Plus/Minus	2	1390595	1
GFLSN1V01AMCS3	gen48	inversion	3790022	Plus/Minus	4364726	Plus/Plus	2	574704	1
GFLSN1V01BJHZH	gen48	inversion	1827454	Plus/Minus	1610360	Plus/Plus	2	217094	1
GFLSN1V02I3PAG	gen48	inversion	4436749	Plus/Plus	4634812	Plus/Minus	2	198063	1
GFLSN1V02JIQ93	gen48	inversion	46330	Plus/Minus	3449227	Plus/Plus	2	3402897	1
GFLSN1V02HSSKN	gen48	inversion	2680807	Plus/Plus	1039040	Plus/Minus	2	1641767	1
GFLSN1V02GC0DS	gen48	inversion	2360697	Plus/Plus	511329	Plus/Minus	2	1849368	1
GFLSN1V02HE25A	gen48	inversion	2804745	Plus/Minus	408986	Plus/Plus	2	2395759	1
GFLSN1V02HJSLE	gen48	inversion	1168139	Plus/Plus	3490056	Plus/Minus	2	2321917	1
GFLSN1V01BURAQ	gen48	inversion	618676	Plus/Minus	1160580	Plus/Plus	3	541904	1
GFLSN1V01ETIS1	gen48	inversion	1869772	Plus/Minus	3990832	Plus/Plus	3	2121060	1
GFLSN1V01DQUYZ	gen48	inversion	2182933	Plus/Plus	1785284	Plus/Minus	3	397649	1
GFLSN1V02I0H4M	gen48	inversion	153048	Plus/Minus	452406	Plus/Plus	3	299358	1
GFLSN1V02IF1GA	gen48	inversion	3846635	Plus/Plus	4548308	Plus/Minus	3	701673	1
GFLSN1V02J0W51	gen48	inversion	262778	Plus/Plus	4280174	Plus/Minus	3	4017396	1
GFLSN1V01CM9WJ	gen48	inversion	1123562	Plus/Plus	4327990	Plus/Minus	4	3204428	1
GFLSN1V02GABXQ	gen48	inversion	2915756	Plus/Plus	2914774	Plus/Minus	4	982	1
GFLSN1V02G3D6G	gen48	inversion	4269114	Plus/Plus	1209345	Plus/Minus	4	3059769	1
GFLSN1V01A1QBA	gen48	inversion	4033620	Plus/Plus	4670587	Plus/Minus	5	636967	1
GFLSN1V01D3BHB	gen48	inversion	1710722	Plus/Minus	1717979	Plus/Plus	5	7257	1
GFLSN1V02ISKBX	gen48	inversion	4062960	Plus/Plus	4216144	Plus/Minus	5	153184	1
GFLSN1V02HY2FC	gen48	inversion	104275	Plus/Plus	3904283	Plus/Minus	5	3800008	1
GFLSN1V02G2RYM	gen48	inversion	3981929	Plus/Minus	3093640	Plus/Plus	5	888289	1
GFLSN1V01ELVB4	gen48	inversion	4428335	Plus/Plus	4428294	Plus/Minus	6	41	1
GFLSN1V01DQ1QB	gen48	inversion	3845852	Plus/Minus	4253150	Plus/Plus	6	407298	1
GFLSN1V01BUJNN	gen48	inversion	2437669	Plus/Plus	2703708	Plus/Minus	6	266039	1
GFLSN1V02GNMEX	gen48	inversion	814140	Plus/Plus	3675075	Plus/Minus	6	2860935	1
GFLSN1V02I3SNI	gen48	inversion	2722852	Plus/Plus	4168084	Plus/Minus	6	1445232	1
GFLSN1V01CX2KF	gen48	inversion	321460	Plus/Plus	651703	Plus/Minus	7	330243	1
GFLSN1V01AO0O5	gen48	inversion	2727311	Plus/Minus	539793	Plus/Plus	7	2187518	1
GFLSN1V01AHZRQ	gen48	inversion	3184386	Plus/Minus	1613411	Plus/Plus	8	1570975	1
GFLSN1V02IZA0K	gen48	inversion	2635134	Plus/Plus	3738253	Plus/Minus	8	1103119	1
GFLSN1V02IBBZ1	gen48	inversion	4542767	Plus/Plus	1046583	Plus/Minus	8	3496184	1
GFLSN1V02HG84U	gen48	inversion	582674	Plus/Plus	3886566	Plus/Minus	8	3303892	1
GFLSN1V01A6NKW	gen48	inversion	1654871	Plus/Plus	1654854	Plus/Minus	9	17	1
GFLSN1V01C0BRM	gen48	inversion	3544989	Plus/Plus	2344189	Plus/Minus	9	1200800	1
GFLSN1V01BPIQ5	gen48	inversion	3616520	Plus/Minus	1264774	Plus/Plus	9	2351746	1
GFLSN1V02JXLVL	gen48	inversion	3172488	Plus/Minus	4475034	Plus/Plus	9	1302546	1
GFLSN1V02HHZPE	gen48	inversion	2638306	Plus/Minus	4126531	Plus/Plus	9	1488225	1
GFLSN1V01CXA8M	gen48	inversion	4168656	Plus/Plus	4401082	Plus/Minus	10	232426	1
GFLSN1V01AM5X3	gen48	inversion	456020	Plus/Plus	4120213	Plus/Minus	10	3664193	1
GFLSN1V02IGUEO	gen48	inversion	2500441	Plus/Minus	4764709	Plus/Plus	10	2264268	1
GFLSN1V02HRQDM	gen48	inversion	4206951	Plus/Minus	1147808	Plus/Plus	10	3059143	1
GFLSN1V02HN2QQ	gen48	inversion	1463379	Plus/Plus	1323237	Plus/Minus	10	140142	1
GFLSN1V01EMQ0S	gen48	inversion	4504709	Plus/Minus	4702873	Plus/Plus	12	198164	1
GFLSN1V02ITBVM	gen48	inversion	3454416	Plus/Plus	454286	Plus/Minus	12	3000130	1
GFLSN1V02F0THC	gen48	inversion	208117	Plus/Minus	3976879	Plus/Plus	12	3768762	1
GFLSN1V02ISH76	gen48	inversion	413101	Plus/Minus	746353	Plus/Plus	13	333252	1
GFLSN1V02HOFOR	gen48	inversion	4503884	Plus/Plus	4359706	Plus/Minus	13	144178	1
GFLSN1V02HN5N1	gen48	inversion	2246676	Plus/Minus	3304932	Plus/Plus	13	1058256	1
GFLSN1V01ERSUA	gen48	inversion	3627875	Plus/Plus	3340600	Plus/Minus	14	287275	1
GFLSN1V02HR39L	gen48	inversion	4520624	Plus/Plus	1086085	Plus/Minus	14	3434539	1
GFLSN1V02J57RN	gen48	inversion	3469030	Plus/Minus	4414553	Plus/Plus	15	945523	1
GFLSN1V02H11P7	gen48	inversion	4187580	Plus/Plus	4185097	Plus/Minus	15	2483	1
GFLSN1V02GSR9L	gen48	inversion	4724569	Plus/Plus	3207944	Plus/Minus	18	1516625	1
GFLSN1V01AGAB8	gen240	deletion	4497092	Plus/Plus	4497148	Plus/Plus	0	55	1
GFLSN1V01CZQS1	gen240	deletion	1217574	Plus/Minus	1217544	Plus/Minus	0	29	1
GFLSN1V02GML79	gen240	deletion	739427	Plus/Minus	739198	Plus/Minus	0	228	1
GFLSN1V01EJ7CG	gen240	deletion	2381699	Plus/Minus	2381089	Plus/Minus	1	610	1
GFLSN1V01AJSQ3	gen240	deletion	3746697	Plus/Minus	3746619	Plus/Minus	2	79	1
GFLSN1V02FKGE6	gen240	deletion	4455597	Plus/Minus	4455441	Plus/Minus	2	157	1
GFLSN1V02JWHHI	gen240	deletion	400599	Plus/Plus	400732	Plus/Plus	3	135	1
GFLSN1V01AJ93L	gen240	deletion	2743289	Plus/Minus	2743242	Plus/Minus	5	51	1
GFLSN1V01CTLYT	gen240	deletion	1105457	Plus/Plus	1105511	Plus/Plus	10	63	3
GFLSN1V02FXLSF	gen240	deletion	4122928	Plus/Minus	4124120	plus/Minus	11	1202	1
GFLSN1V02IQHRK	gen240	deletion	3883688	Plus/Minus	3883275	Plus/Minus	73	485	1
GFLSN1V02G482J	gen240	deletion	1853018	Plus/Plus	1853448	Plus/Plus	94	523	1
GFLSN1V02GE20L	gen240	deletion	2970335	Plus/Minus	2970295	Plus/Minus	100	139	1
GFLSN1V01BI41E	gen240	deletion	3414232	Plus/Plus	3414345	Plus/Plus	122	234	1
GFLSN1V01CV1FO	gen240	duplication	4058624	Plus/Minus	3155867	Plus/Minus	0	3954675	1
GFLSN1V01EB015	gen240	duplication	3717862	Plus/Plus	2394867	Plus/Plus	0	1322995	1
GFLSN1V01C5L9P	gen240	duplication	246999	Plus/Plus	2325428	Plus/Plus	0	2779003	1
GFLSN1V01BTOEH	gen240	duplication	4024550	Plus/Plus	4464323	Plus/Plus	0	4417659	1
GFLSN1V01EXM9I	gen240	duplication	155710	Plus/Plus	2524931	Plus/Plus	0	2488211	1
GFLSN1V02INW0R	gen240	duplication	896180	Plus/Plus	2743101	Plus/Plus	0	3010511	1
GFLSN1V02JJ1RK	gen240	duplication	3647659	Plus/Minus	4776877	Plus/Minus	0	1129218	1
GFLSN1V02H6FAG	gen240	duplication	2505571	Plus/Minus	3421379	Plus/Minus	0	915808	1
GFLSN1V02IADMU	gen240	duplication	4400056	Plus/Minus	1873546	Plus/Minus	0	2330922	1
GFLSN1V02I79KZ	gen240	duplication	436986	Plus/Plus	4799388	Plus/Plus	0	495030	1
GFLSN1V01B4SGP	gen240	duplication	4171659	Plus/Minus	3241580	Plus/Minus	1	3927353	1
GFLSN1V02I5GZO	gen240	duplication	2478091	Plus/Plus	3496145	Plus/Plus	1	3839378	1
GFLSN1V01AHXMQ	gen240	duplication	1594109	Plus/Minus	3143030	Plus/Minus	2	1548921	1
GFLSN1V01DL8TN	gen240	duplication	3247031	Plus/Minus	3906330	Plus/Minus	2	659299	1
GFLSN1V01D26LD	gen240	duplication	3766058	Plus/Plus	3607487	Plus/Plus	2	158571	1
GFLSN1V02H2SD1	gen240	duplication	2224448	Plus/Minus	1904996	Plus/Minus	7	4537980	1
GFLSN1V02G1RUG	gen240	duplication	2060593	Plus/Minus	2080346	Plus/Minus	8	19753	1
GFLSN1V01D03J1	gen240	duplication	747832	Plus/Minus	989456	Plus/Minus	12	241624	1
GFLSN1V02HEX9C	gen240	duplication	285177	Plus/Minus	2651049	Plus/Minus	13	2365872	1
GFLSN1V02GQP38	gen240	duplication	2777038	Plus/Plus	2728534	Plus/Plus	14	48504	1
GFLSN1V01BLGB5	gen240	inversion	3265547	Plus/Minus	959297	Plus/Plus	0	2306250	1
GFLSN1V01D2RUJ	gen240	inversion	241090	Plus/Plus	92912	Plus/Minus	0	148178	1
GFLSN1V02JZQ5P	gen240	inversion	2385345	Plus/Plus	343243	Plus/Minus	0	2042102	1
GFLSN1V02HRWU2	gen240	inversion	4458339	Plus/Minus	2097858	Plus/Plus	0	2360481	1
GFLSN1V01CXGH0	gen240	inversion	4140056	Plus/Minus	2714991	Plus/Plus	1	1425065	1
GFLSN1V01AMB9W	gen240	inversion	4804666	Plus/Minus	3726631	Plus/Plus	1	1078035	1
GFLSN1V01D22H1	gen240	inversion	4592341	Plus/Minus	4426174	Plus/Plus	1	166167	1
GFLSN1V02I86Z1	gen240	inversion	2631988	Plus/Plus	1476047	Plus/Minus	1	1155941	1
GFLSN1V02IZELH	gen240	inversion	2892884	Plus/Plus	462677	Plus/Minus	1	2430207	1
GFLSN1V02JQKVE	gen240	inversion	4041004	Plus/Plus	1809532	Plus/Minus	1	2231472	1
GFLSN1V01ADNAS	gen240	inversion	590637	Plus/Minus	4820638	Plus/Plus	3	4230001	1
GFLSN1V02HFQYS	gen240	inversion	1997977	Plus/Plus	60135	Plus/Minus	3	1937842	1
GFLSN1V02JO41S	gen240	inversion	2084593	Plus/Plus	408680	Plus/Minus	3	1675913	1
GFLSN1V02F3274	gen240	inversion	2915756	Plus/Plus	2914774	Plus/Minus	4	982	1
GFLSN1V01CAL03	gen240	inversion	4542993	Plus/Minus	472504	Plus/Plus	5	4070489	1
GFLSN1V02HCG6D	gen240	inversion	1889920	Plus/Minus	469476	Plus/Plus	5	1420444	1
GFLSN1V01BXW3I	gen240	inversion	739058	Plus/Plus	4287402	Plus/Minus	7	3548344	1
GFLSN1V01B97QT	gen240	inversion	4189567	Plus/Minus	145526	Plus/Plus	8	4044041	1
GFLSN1V01DEUJP	gen240	inversion	3815649	Plus/Plus	4158934	Plus/Minus	11	343285	1
GFLSN1V01AF6DT	gen240	inversion	1271991	Plus/Minus	4609237	Plus/Plus	11	3337246	1
GFLSN1V01E280V	gen240	inversion	4152064	Plus/Minus	1142228	Plus/Plus	12	3009836	1
GFLSN1V02HADFA	gen240	inversion	1156773	Plus/Plus	1028634	Plus/Minus	15	128139	1
GFLSN1V01CA0FI	gen144	deletion	1042315	Plus/Plus	1042855	Plus/Plus	0	539	1
GFLSN1V01AJ7WH	gen144	deletion	4718007	Plus/Plus	4718208	Plus/Plus	0	200	1
GFLSN1V01B7ID3	gen144	deletion	4120741	Plus/Plus	4121566	Plus/Plus	0	824	1
GFLSN1V01CKNRX	gen144	deletion	1717164	Plus/Minus	1717114	Plus/Minus	0	49	1
GFLSN1V01BA0IL	gen144	deletion	752314	Plus/Minus	752226	Plus/Minus	0	87	1
GFLSN1V01AIEED	gen144	deletion	2429611	Plus/Plus	2429905	Plus/Plus	0	293	1
GFLSN1V01CB6BS	gen144	deletion	1646959	Plus/Plus	1647074	Plus/Plus	0	114	1
GFLSN1V02JL3NZ	gen144	deletion	2098487	Plus/Plus	2098759	Plus/Plus	0	271	1
GFLSN1V02IPVZ9	gen144	deletion	1415983	Plus/Minus	1415945	Plus/Minus	0	37	1
GFLSN1V02JYEEH	gen144	deletion	638457	Plus/Plus	638596	Plus/Plus	0	138	1
GFLSN1V02JHF0H	gen144	deletion	2432942	Plus/Minus	2432791	Plus/Minus	1	151	1
GFLSN1V02G516Q	gen144	deletion	785400	Plus/Minus	784861	Plus/Minus	1	539	1
GFLSN1V02HJFVL	gen144	deletion	1186249	Plus/Plus	1186297	Plus/Plus	1	48	1
GFLSN1V02IWOND	gen144	deletion	3812116	Plus/Minus	3812068	Plus/Minus	2	49	1
GFLSN1V01A0YHU	gen144	deletion	2444406	Plus/Minus	2444193	Plus/Minus	3	215	1
GFLSN1V02GEUHD	gen144	deletion	3666251	Plus/Minus	3665819	Plus/Minus	3	434	1
GFLSN1V02J5V79	gen144	deletion	652900	Plus/Minus	652868	Plus/Minus	3	34	1
GFLSN1V01D4ETW	gen144	deletion	1858008	Plus/Plus	1858027	Plus/Plus	6	24	1
GFLSN1V01EUBRC	gen144	deletion	815043	Plus/Plus	815501	Plus/Plus	9	466	1
GFLSN1V02HJVJW	gen144	deletion	884431	Plus/Plus	885315	Plus/Plus	10	893	1
GFLSN1V01CQCBJ	gen144	deletion	3674934	Plus/Minus	3674908	Plus/Minus	12	37	2
GFLSN1V02J1EY1	gen144	deletion	3859043	Plus/Plus	3859407	Plus/Plus	12	375	1
GFLSN1V01CBOOP	gen144	deletion	2645649	Plus/Minus	2644880	Plus/Minus	21	789	1
GFLSN1V01AJ9N7	gen144	deletion	2629998	Plus/Minus	2629346	Plus/Minus	24	675	1
GFLSN1V01DHYJ1	gen144	deletion	4474558	Plus/Minus	4473554	Plus/Minus	26	1029	1
GFLSN1V01CPT7F	gen144	deletion	3610377	Plus/Plus	3611190	Plus/Plus	31	843	1
GFLSN1V02I19M7	gen144	deletion	4489895	Plus/Minus	4489332	Plus/Minus	38	600	2
GFLSN1V01DV19P	gen144	deletion	179041	Plus/Plus	179288	Plus/Plus	62	308	1
GFLSN1V01D5XF7	gen144	deletion	819064	Plus/Minus	818855	Plus/Minus	78	286	2
GFLSN1V02I49QM	gen144	deletion	4596883	Plus/Minus	4596496	Plus/Minus	78	464	1
GFLSN1V01BNB8K	gen144	duplication	4652558	Plus/Minus	2883045	Plus/Minus	0	3087919	1
GFLSN1V01D15FK	gen144	duplication	3677340	Plus/Minus	1766176	Plus/Minus	0	2946268	1
GFLSN1V01B2V8O	gen144	duplication	1055831	Plus/Minus	118739	Plus/Minus	0	3920340	1
GFLSN1V01C9FGP	gen144	duplication	3746275	Plus/Plus	1591186	Plus/Plus	0	2155089	1
GFLSN1V01ADNG2	gen144	duplication	3824912	Plus/Minus	4132787	Plus/Minus	0	307875	1
GFLSN1V01BD80V	gen144	duplication	2320594	Plus/Plus	248619	Plus/Plus	0	2071975	1
GFLSN1V02HHHY3	gen144	duplication	1375282	Plus/Plus	1258720	Plus/Plus	0	116562	1
GFLSN1V02J1R2O	gen144	duplication	4657383	Plus/Plus	254233	Plus/Plus	0	4403150	1
GFLSN1V02IC7MF	gen144	duplication	482758	Plus/Minus	3676258	Plus/Minus	0	3193500	1
GFLSN1V02HZRIV	gen144	duplication	3062317	Plus/Plus	959664	Plus/Plus	0	2102653	1
GFLSN1V02F7SVT	gen144	duplication	1010035	Plus/Minus	4311967	Plus/Minus	0	3301932	1
GFLSN1V02JZWQN	gen144	duplication	3385710	Plus/Minus	4736429	Plus/Minus	0	1350719	1
GFLSN1V02G60OS	gen144	duplication	1636832	Plus/Plus	2310763	Plus/Plus	0	4183501	1
GFLSN1V02HIJM1	gen144	duplication	2364421	Plus/Minus	2968079	Plus/Minus	0	603658	1
GFLSN1V02I354F	gen144	duplication	802756	Plus/Minus	1638055	Plus/Minus	0	835299	1
GFLSN1V02HXIBQ	gen144	duplication	3779629	Plus/Plus	2554047	Plus/Plus	0	1225582	1
GFLSN1V02IW3FO	gen144	duplication	1247088	Plus/Minus	2582041	Plus/Minus	0	1334953	1
GFLSN1V02GB1OW	gen144	duplication	4117411	Plus/Minus	99267	Plus/Minus	0	839288	1
GFLSN1V02JOQ6U	gen144	duplication	4493179	Plus/Plus	125106	Plus/Plus	0	4368073	1
GFLSN1V01EFQH6	gen144	duplication	617767	Plus/Plus	4444672	Plus/Plus	1	1030527	1
GFLSN1V01DKGUC	gen144	duplication	3747790	Plus/Plus	2870121	Plus/Plus	1	877669	1
GFLSN1V01DG2Q2	gen144	duplication	3385442	Plus/Minus	3948972	Plus/Minus	1	563530	1
GFLSN1V01EG4IA	gen144	duplication	1836437	Plus/Minus	4240876	Plus/Minus	1	2404439	1
GFLSN1V01AXR8Q	gen144	duplication	3479347	Plus/Plus	3371762	Plus/Plus	1	107585	1
GFLSN1V01CM9IP	gen144	duplication	762510	Plus/Plus	991396	Plus/Plus	1	4628546	1
GFLSN1V01DGTC6	gen144	duplication	1117866	Plus/Plus	801237	Plus/Plus	1	316629	1
GFLSN1V01EF21F	gen144	duplication	1285813	Plus/Minus	2075140	Plus/Minus	1	789327	1
GFLSN1V01CCZEU	gen144	duplication	2734412	Plus/Minus	4040696	Plus/Minus	1	1306284	1
GFLSN1V02HZQNM	gen144	duplication	973111	Plus/Minus	3918456	Plus/Minus	1	2945345	1
GFLSN1V02G5GH8	gen144	duplication	50509	Plus/Plus	43722	Plus/Plus	1	6787	1
GFLSN1V02G6GBV	gen144	duplication	1423488	Plus/Minus	2992127	Plus/Minus	1	1568639	1
GFLSN1V02GNQ2F	gen144	duplication	4231875	Plus/Plus	3580048	Plus/Plus	1	651827	1
GFLSN1V02GFMNQ	gen144	duplication	227573	Plus/Plus	237706	Plus/Plus	2	4847299	1
GFLSN1V02HWAPQ	gen144	duplication	4267898	Plus/Plus	418401	Plus/Plus	3	3849497	1
GFLSN1V01CDKPU	gen144	duplication	1390525	Plus/Minus	2651588	Plus/Minus	4	1261063	1
GFLSN1V02FHKKO	gen144	duplication	3818621	Plus/Minus	4780531	Plus/Minus	4	961910	1
GFLSN1V01CJPL0	gen144	duplication	4290879	Plus/Plus	618945	Plus/Plus	5	3671934	1
GFLSN1V01ERTA1	gen144	duplication	4775123	Plus/Plus	3166813	Plus/Plus	5	1608310	1
GFLSN1V01EWILV	gen144	duplication	4505524	Plus/Plus	1792438	Plus/Plus	5	2713086	1
GFLSN1V02HU3SY	gen144	duplication	3225905	Plus/Minus	859083	Plus/Minus	5	2490610	1
GFLSN1V01ES2PS	gen144	duplication	2749154	Plus/Minus	4028333	Plus/Minus	7	1279179	1
GFLSN1V01EZ7OF	gen144	duplication	4671702	Plus/Minus	3542765	Plus/Minus	7	3728495	1
GFLSN1V01DH6G9	gen144	duplication	1079756	Plus/Minus	4163073	Plus/Minus	9	3083317	1
GFLSN1V01EG969	gen144	duplication	1855406	Plus/Minus	4181029	Plus/Minus	9	2325623	1
GFLSN1V02GXC72	gen144	duplication	1570420	Plus/Plus	2422095	Plus/Plus	9	4005757	1
GFLSN1V01CP54E	gen144	duplication	2007120	Plus/Plus	1437712	Plus/Plus	10	569408	1
GFLSN1V01ECGDR	gen144	duplication	482652	Plus/Minus	1556172	Plus/Minus	10	1073520	1
GFLSN1V01CPXV3	gen144	duplication	4674717	Plus/Plus	267595	Plus/Plus	11	4407122	1
GFLSN1V01C84DY	gen144	duplication	2610786	Plus/Minus	1819560	Plus/Minus	11	4066206	1
GFLSN1V01DBM0Z	gen144	duplication	2073508	Plus/Plus	2060485	Plus/Plus	12	13023	2
GFLSN1V01DCAM8	gen144	duplication	453970	Plus/Minus	982287	Plus/Minus	12	528317	1
GFLSN1V01BNVLK	gen144	duplication	2630046	Plus/Plus	1504938	Plus/Plus	12	1125108	1
GFLSN1V02GKDWD	gen144	duplication	987525	Plus/Minus	4164586	Plus/Minus	13	3177061	1
GFLSN1V01B2NCB	gen144	duplication	1547770	Plus/Minus	903825	Plus/Minus	14	4213487	1
GFLSN1V01ANSB6	gen144	duplication	848486	Plus/Plus	1178171	Plus/Plus	14	4527747	1
GFLSN1V01CD34M	gen144	duplication	4650088	Plus/Minus	367251	Plus/Minus	15	574595	1
GFLSN1V01BF1IB	gen144	duplication	393384	Plus/Plus	2752579	Plus/Plus	15	2498237	1
GFLSN1V01ELXD4	gen144	duplication	2660794	Plus/Minus	4779696	Plus/Minus	18	2118902	1
GFLSN1V01C9T7N	gen144	duplication	1483352	Plus/Minus	3316866	Plus/Minus	25	1833514	1
GFLSN1V02FIWSU	gen144	duplication	2777025	Plus/Minus	2728572	Plus/Minus	39	4808979	1
GFLSN1V01EYGZP	gen144	duplication	1690895	Plus/Minus	2513637	Plus/Minus	50	822742	1
GFLSN1V01CI2NI	gen144	duplication	815338	Plus/Minus	815382	Plus/Minus	90	44	2
GFLSN1V01C76L5	gen144	inversion	983217	Plus/Plus	872945	Plus/Minus	0	110272	1
GFLSN1V01CSBTW	gen144	inversion	3418897	Plus/Plus	358619	Plus/Minus	0	3060278	1
GFLSN1V01CJ7J2	gen144	inversion	4332489	Plus/Minus	4163896	Plus/Plus	0	168593	1
GFLSN1V01BFRA9	gen144	inversion	164652	Plus/Plus	1972829	Plus/Minus	0	1808177	1
GFLSN1V01DIJ09	gen144	inversion	4190749	Plus/Minus	2981176	Plus/Plus	0	1209573	1
GFLSN1V01A00MM	gen144	inversion	488323	Plus/Plus	835955	Plus/Minus	0	347632	1
GFLSN1V01BBXN7	gen144	inversion	2620285	Plus/Plus	1985253	Plus/Minus	0	635032	1
GFLSN1V01C4CY4	gen144	inversion	4172560	Plus/Plus	3985729	Plus/Minus	0	186831	1
GFLSN1V01CSY0G	gen144	inversion	1260754	Plus/Minus	2203383	Plus/Plus	0	942629	1
GFLSN1V01EC1C5	gen144	inversion	3060119	Plus/Minus	1991087	Plus/Plus	0	1069032	1
GFLSN1V01EI0U6	gen144	inversion	2041572	Plus/Minus	3302291	Plus/Plus	0	1260719	1
GFLSN1V01EPQPP	gen144	inversion	1993106	Plus/Plus	912399	Plus/Minus	0	1080707	1
GFLSN1V02HDUN2	gen144	inversion	2736455	Plus/Minus	3202179	Plus/Plus	0	465724	1
GFLSN1V02JR8UV	gen144	inversion	3263086	Plus/Plus	656563	Plus/Minus	0	2606523	1
GFLSN1V02FL1J5	gen144	inversion	3659514	Plus/Plus	1388307	Plus/Minus	0	2271207	1
GFLSN1V02GWNX0	gen144	inversion	496262	Plus/Minus	2922949	Plus/Plus	0	2426687	1
GFLSN1V02GM0AE	gen144	inversion	3860354	Plus/Plus	4204328	Plus/Minus	0	343974	1
GFLSN1V02F1QNH	gen144	inversion	1300087	Plus/Plus	3454530	Plus/Minus	0	2154443	1
GFLSN1V02GQ234	gen144	inversion	2529106	Plus/Plus	1639144	Plus/Minus	0	889962	1
GFLSN1V02ID47P	gen144	inversion	3624982	Plus/Plus	3801276	Plus/Minus	0	176294	1
GFLSN1V02JOY67	gen144	inversion	2609923	Plus/Minus	135735	Plus/Plus	0	2474188	1
GFLSN1V02G93Y4	gen144	inversion	250577	Plus/Plus	1012461	Plus/Minus	0	761884	1
GFLSN1V01EM0FP	gen144	inversion	2332981	Plus/Minus	934689	Plus/Plus	1	1398292	1
GFLSN1V01DON4V	gen144	inversion	2233231	Plus/Minus	2141919	Plus/Plus	1	91312	1
GFLSN1V01C5ATV	gen144	inversion	2637770	Plus/Minus	3244747	Plus/Plus	1	606977	1
GFLSN1V02H4VHH	gen144	inversion	368003	Plus/Minus	3762686	Plus/Plus	1	3394683	1
GFLSN1V02F7QBP	gen144	inversion	1031739	Plus/Minus	3203631	Plus/Plus	1	2171892	1
GFLSN1V02JG1NC	gen144	inversion	4845173	Plus/Minus	4784979	Plus/Plus	1	60194	1
GFLSN1V01DMXCD	gen144	inversion	4135925	Plus/Plus	50084	Plus/Minus	2	4085841	1
GFLSN1V01BP2G4	gen144	inversion	1724237	Plus/Plus	3543413	Plus/Minus	2	1819176	1
GFLSN1V01E40ZI	gen144	inversion	4549776	Plus/Minus	4302434	Plus/Plus	2	247342	1
GFLSN1V01EPS3Y	gen144	inversion	4217663	Plus/Minus	2395493	Plus/Plus	3	1822170	1
GFLSN1V01BN5G7	gen144	inversion	3664397	Plus/Minus	1400735	Plus/Plus	3	2263662	1
GFLSN1V01DOIV4	gen144	inversion	1113824	Plus/Plus	1113809	Plus/Minus	3	15	1
GFLSN1V02GY1RV	gen144	inversion	662534	Plus/Plus	2259514	Plus/Minus	3	1596980	1
GFLSN1V02HABZC	gen144	inversion	4855947	Plus/Plus	1993062	Plus/Minus	3	2862885	1
GFLSN1V02F99I4	gen144	inversion	552934	Plus/Minus	2126450	Plus/Plus	4	1573516	1
GFLSN1V01EKV1P	gen144	inversion	124772	Plus/Minus	1564780	Plus/Plus	5	1440008	1
GFLSN1V02JIE4R	gen144	inversion	2873746	Plus/Plus	982655	Plus/Minus	5	1891091	1
GFLSN1V01BUVH8	gen144	inversion	3158407	Plus/Minus	3374215	Plus/Plus	6	215808	1
GFLSN1V01BFS2B	gen144	inversion	67176	Plus/Plus	779386	Plus/Minus	6	712210	1
GFLSN1V01ADZ9K	gen144	inversion	3926359	Plus/Plus	1306252	Plus/Minus	7	2620107	1
GFLSN1V02F6JG2	gen144	inversion	1474980	Plus/Minus	2902488	Plus/Plus	7	1427508	1
GFLSN1V02I8YJC	gen144	inversion	2589961	Plus/Plus	35163	Plus/Minus	7	2554798	1
GFLSN1V01DA39U	gen144	inversion	2533735	Plus/Minus	3727240	Plus/Plus	8	1193505	1
GFLSN1V02IG8BZ	gen144	inversion	2857697	Plus/Minus	499757	Plus/Plus	8	2357940	1
GFLSN1V02F5XIG	gen144	inversion	816353	Plus/Plus	2676555	Plus/Minus	9	1860202	1
GFLSN1V02JH4TR	gen144	inversion	4648987	Plus/Minus	3860781	Plus/Plus	9	788206	1
GFLSN1V01BFLHD	gen144	inversion	3326849	Plus/Plus	2600392	Plus/Minus	10	726457	1
GFLSN1V02H55AI	gen144	inversion	4414073	Plus/Plus	5378	Plus/Minus	10	4408695	1
GFLSN1V02GS42Z	gen144	inversion	297216	Plus/Minus	100294	Plus/Plus	10	196922	1
GFLSN1V02J6UMF	gen144	inversion	4092972	Plus/Plus	101984	Plus/Minus	11	3990988	1
GFLSN1V02F5YWK	gen144	inversion	4346936	Plus/Minus	4389743	Plus/Plus	11	42807	1
GFLSN1V02JW4GF	gen144	inversion	3156241	Plus/Minus	2644331	Plus/Plus	11	511910	1
GFLSN1V01DNZTX	gen144	inversion	4514781	Plus/Plus	1232221	Plus/Minus	12	3282560	1
GFLSN1V02H66GB	gen144	inversion	1657783	Plus/Plus	4349275	Plus/Minus	12	2691492	1
GFLSN1V01BV6H4	gen144	inversion	2368026	Plus/Minus	2316436	Plus/Plus	15	51590	1
GFLSN1V02J5SNE	gen144	inversion	572927	Plus/Minus	572927	Plus/Plus	20	0	1
