# Supplementary material for: Genome-Wide Detection of Spontaneous Chromosomal Rearrangements in Bacteria
Source: PLoS One. 2012 Aug 3;7(8):e42639. doi: 10.1371/journal.pone.0042639 (PMC3411829; doi:10.1371/journal.pone.0042639)
Supplement: Table S2 — List of genes that were found deleted in genome comparison analysis between S. typhimurium and other Salmonella subspecies/serovars. (XLSX) [file pone.0042639.s005.xlsx]

## Sheet: deletedGene_observedTimes_strai
Table S2. List of genes that were found deleted in genome comparison analysis between S. typhimurium and other Salmonella subspecies/serovars.
Gene Name	Times being found
STM0159	14
STM0291	14
tolA	14
STM0929	14
nanH	14
STM0927	14
STM0926	14
STM0925.S	14
STM0924	14
STM0923	14
STM0922	14
STM0921	14
STM0920	14
STM0919	14
STM0918	14
STM0909	14
STM0908	14
STM0907	14
STM0905	14
STM0903	14
STM0902	14
STM0901	14
STM0900	14
STM0899	14
STM0898A	14
STM0898	14
STM0897	14
STM0896	14
STM0895	14
STM0894	14
STM0893	14
STM0895.1n	14
STM0928.1c	14
STM0948	14
STM0947	14
tnpA_2	14
shdA	14
STM2629	14
STM2628	14
STM2623	14
STM2622	14
STM2727	14
STM2726	14
STM2724	14
STM2706	14
STM2705	14
STM2704	14
STM2703	14
STM2702	14
rrlD	14
bigA	14
tnpA_5	14
STM3519.1N	14
STM3846.s	14
STM3845	14
STM3844	14
rrlA	14
rrlB	14
STM4200	14
tnpA_6	14
STM4320	14
STM4495	14
STM4494	14
STM4493	14
STM4492	14
STM4491	14
STM4498	14
STM4497	14
STM4496	14
STM0099	13
rrlH	13
STM0292	13
yaiU	13
STM0917	13
STM0916	13
STM0915	13
STM0914	13
STM0913	13
STM0912	13
STM0911	13
STM0910	13
STM0906	13
STM0904	13
STM0913.1N	13
STM0913.2N	13
STM0916.1N	13
tnpA_1	13
STM1019	13
STM1018	13
STM1017	13
STM1016	13
STM1015	13
STM1014	13
STM1013	13
STM1012	13
STM1011	13
STM1553	13
STM1552	13
tnpA_3	13
STM2627	13
STM2626	13
STM2625	13
STM2624	13
STM2621	13
STM2620	13
STM2619	13
STM2618	13
STM2617	13
STM2616	13
STM2615	13
STM2614	13
STM2613	13
STM2612	13
STM2611.S	13
STM2610	13
STM2601	13
STM2600	13
STM2594	13
STM2588	13
STM2587	13
STM2586	13
STM2585A	13
STM2585	13
STM2762	13
STM2760	13
STM2759	13
STM2758	13
STM2757	13
STM2756	13
STM2755	13
STM2754	13
STM2753	13
STM2752	13
STM2751	13
STM2750	13
STM2749	13
STM2748	13
STM2747	13
STM2746	13
STM2745	13
STM2744	13
STM2743	13
STM2742	13
STM2741	13
STM2740	13
STM2740.1N	13
STM2763	13
STM2769	13
STM2768	13
STM2767	13
STM2766	13
tnpA_4	13
STM4199	13
STM4490	13
hsdS	13
STM3691	13
STM0065	12
STM0279	12
STM0278	12
STM0277	12
STM0294	12
STM0293	12
slrP	12
STM1024	12
STM1554	12
STM2240	12
STM2239	12
STM2238	12
STM2237	12
STM2236	12
STM2235	12
STM2234	12
STM2233	12
oafA	12
STM2231	12
STM2230.1c	12
STM2609	12
STM2608	12
STM2607	12
STM2606	12
STM2605	12
STM2604	12
STM2603	12
STM2602	12
STM2599	12
STM2598	12
STM2597	12
STM2596	12
STM2595	12
STM2593	12
STM2592	12
STM2591	12
STM2590	12
STM2589	12
STM2761	12
STM2735	12
STM2734	12
STM2730	12
STM2723	12
STM2711	12
STM2697	12
STM2694	12
rrlC	12
yigG	12
yigF	12
rarD	12
gltV	12
rrlE	12
STM4436	12
STM4435	12
STM4434	12
STM4433	12
STM4432	12
STM4431	12
STM4430	12
STM4429	12
STM4428	12
STM4427	12
srfJ	12
STM4425	12
STM4424.S	12
STM4423	12
STM4422	12
STM4421	12
STM4420	12
STM4419	12
STM4418	12
STM4417	12
STM0276	11
STM0290	11
STM0289	11
STM1023	11
STM1010	11
STM1009	11
STM1049	11
STM1551	11
STM1550	11
STM1896	11
STM2137	11
STM2507	11
STM2636	11
STM2635	11
STM2634	11
STM2633.S	11
STM2632	11
STM2631	11
STM2630	11
gogB	11
STM2739	11
STM2738	11
STM2737	11
STM2736	11
STM2733	11
STM2732	11
STM2731	11
STM2729	11
STM2728	11
STM2725	11
STM2722	11
STM2721	11
STM2720	11
STM2719	11
STM2718	11
STM2717	11
STM2716	11
STM2715.S	11
STM2714	11
STM2713	11
STM2712	11
STM2710	11
STM2709	11
STM2708	11
STM2707	11
STM2701	11
STM2700	11
STM2699	11
STM2698	11
STM2696	11
STM2695	11
STM2954.1n	11
ygcY	11
gudD	11
STM3256	11
STM3255	11
STM3254	11
agaR	11
STM3251	11
STM3291	11
STM4489	11
STM4488	11
STM4503	11
STM4571	11
STM4575	11
STM4574	11
stjC	11
stjB	11
STM0325	10
STM0326	10
STM0577	10
STM0576	10
STM0575	10
STM0574	10
STM0573	10
STM0572	10
STM0571	10
ybgE	10
STM1022	10
STM1021	10
STM1020	10
STM1008.S	10
STM1010.1n	10
STM1021.1n	10
STM1038	10
STM1037	10
STM1036	10
STM1035	10
STM1034	10
STM1033	10
STM1032	10
STM1030	10
STM1549	10
rfbJ	10
STM2453	10
lepA	10
hin	10
STM2903	10
gatY	10
STM3745	10
STM3942	10
STM3941	10
STM3940	10
STM4198	10
mrr	10
hsdR	10
hsdM	10
STM1052	10
STM1029	10
STM1028	10
STM1027	10
STM1026	10
STM1551.1n	10
STM2765	10
STM2764	10
STM3521	10
rtcA	10
STM3517	10
STM3516	10
STM0286	9
STM0275.s	9
STM0274A	9
STM0272	9
STM0726	9
STM0725	9
STM1043	9
STM1042	9
STM1041	9
STM1040	9
STM1039	9
STM1031	9
STM1048	9
STM1047	9
STM1046	9
STM2003	9
rrlG	9
STM2902	9
STM2955.S	9
cyaA	9
STM4195	9
STM4218	9
STM4217	9
STM4216	9
STM4215	9
STM4214	9
STM4213	9
STM4212	9
STM4211	9
STM4210	9
STM4209	9
STM4208	9
STM4207	9
STM4206	9
STM4205	9
STM4204	9
STM4203	9
STM4202	9
STM4201	9
STM4211.1N	9
cycA	9
ybiV(2)	9
STM0839	9
STM1056	9
STM1055	9
STM1054	9
STM1053	9
sseI	9
STM1050	9
rfbV	9
sugR	9
STM1025	9
STM3026	9
STM0287	8
STM0284	8
STM0294.1N	8
STM0294.1c	8
STM0324	8
STM0727	8
STM0724	8
STM0723	8
STM0722	8
STM0721	8
STM0720	8
STM0719	8
STM1007	8
STM1006	8
STM1005	8
STM1457	8
fliC	8
stcD	8
yfeL	8
STM2901	8
cyaY	8
STM4261	8
mpl	8
STM4522	8
STM0288	8
ybiT	8
STM1045	8
sodC	8
STM1048.1N	8
STM1869	8
mig-3	8
STM1868.1N	8
STM3343	8
STM4157	8
STM3566	8
STM0285	7
STM0280	7
STM0268	7
STM0718	7
STM0717	7
STM0716	7
STM0715	7
rfbX	7
fljB	7
fljA	7
9S	7
yjiW	7
STM0438	7
STM0672	7
STM1546	7
STM1869A	7
STM1868A	7
pagK	7
STM1866	7
STM1865	7
STM1870	7
yfbK	7
STM2314	7
STM3278	7
STM3277	7
rtcR	7
STM3520	7
rtcB	7
yhhV	7
STM3558	7
STM3599	7
frwD	7
pflC	7
pflD	7
frwB	7
frwC	7
STM4111	7
ptsA	7
rfc	7
STM1331	7
sspH2	7
STM2293	7
yfaX	7
yfaW	7
yfaV	7
STM2289	7
STM2288	7
rhuM	7
STM3754	7
STM3752	7
STM4529	7
STM4528	7
STM4318	7
STM4317	7
STM0283	6
STM0282	6
STM0281	6
STM0274	6
STM0273	6
STM0271	6
STM0270	6
STM0269	6
STM0267	6
STM1999	6
umuD	6
umuC	6
stcC	6
rrfE	6
STM0295	6
ybeV	6
ybeU	6
ybeS	6
dcoB	6
STM0854	6
STM1555	6
STM1556	6
avrA	6
yghJ	6
STM2943	6
STM2942	6
ygcB	6
yhbW	6
STM3828.1N	6
dgoK	6
dgoR	6
alaT	6
yijO	6
STM4197	6
STM4196	6
STM4312	6
yjeO	6
STM4372	6
STM0296	6
STM0557	6
STM0556	6
STM0555	6
ftsK	6
STM2452	6
STM3034	6
STM3033	6
STM4313	6
STM1545	6
STM1548.s	6
STM1547	6
STM1871	6
STM4158	6
STM4157.1N	6
leuD	5
STM1620	5
asnT	5
stcB	5
STM3785	5
STM3784	5
STM3783	5
STM3782	5
STM3781	5
STM3779	5
STM0334	5
STM0333	5
STM0332	5
STM0331	5
STM0330	5
STM0329	5
STM0328.s	5
STM0327	5
STM0562	5
STM0660	5
hscC	5
ybeR	5
ybeQ	5
STM0769	5
dcoA	5
dcoC	5
STM0765	5
STM0764	5
STM0763.s	5
STM0762	5
STM0761	5
STM0810	5
STM0809	5
yliI	5
STM0860	5
STM0859	5
STM0858	5
STM0857	5
STM0856	5
STM0855	5
envF	5
STM1241.1N	5
ydiP	5
ydiM	5
STM1860	5
STM2011	5
STM2008	5
STM2007	5
STM2006	5
STM2005	5
yfeK	5
ratB	5
STM2689	5
STM3085	5
STM3084.S	5
STM3083	5
STM3082	5
STM3081	5
STM3080	5
STM3079.S	5
STM3117	5
ygiK	5
STM3170	5
STM3169	5
STM3533	5
STM3532	5
STM3531	5
STM3530	5
gldA	5
STM3528	5
dgoA	5
dgoT	5
yidA	5
ileT	5
yijF	5
STM4219.S	5
STM2243	5
STM2242	5
STM3035	5
STM0031	5
STM0030	5
STM0038	5
malY	5
STM1543	5
rfbU	5
rfbN	5
STM4457	5
STM0266	5
STM4015	5
STM4014	5
STM4013.S	5
STM4012	5
STM4011	5
STM4010	5
yohM	5
STM0554	4
pspE	4
STM1785	4
sinH	4
stiA	4
stiB	4
stiC	4
stiH	4
folK	4
STM0201	4
stfG	4
stfF	4
stfE	4
stfD	4
stfC	4
stfA	4
alaV	4
rrfH	4
STM0305	4
ybcI	4
STM0539	4
STM0538	4
STM0561	4
maf	4
STM1188	4
rluC	4
aroD	4
ydiF	4
ydiO	4
ydiQ	4
ydiR	4
ydiS	4
ydiT	4
ydiD	4
ydiL	4
ydiN	4
aroE	4
STM1629	4
rtT	4
STM1760	4
STM2010	4
STM2509	4
STM2508	4
ratA	4
STM3123	4
STM3122	4
STM3121	4
STM3120	4
STM3119	4
STM3118	4
glgP	4
STM3527	4
STM3595	4
lpfA	4
lpfB	4
lpfC	4
lpfD	4
lpfE	4
yibR	4
STM3860	4
gltU	4
STM4033	4
STM4032.2N	4
STM4102	4
glyX	4
STM4534	4
yacH	4
STM0335	4
STM0410	4
STM0409	4
fdrA	4
yfdH	4
lysY	4
STM1861	4
STM2821	4
ygcH	4
STM3397	4
glyY	4
STM0032	4
STM0034	4
STM0033	4
malX	4
STM1542	4
STM1541	4
pqaA	4
STM1864	4
STM1863	4
pagO	4
rfbK	4
rfbP	4
rfbB	4
rfbD	4
rfbA	4
rfbC	4
rfbI	4
rfbF	4
rfbG	4
rfbH	4
rfbM	4
STM3021	4
STM4032	4
STM4031	4
STM4030.S	4
phoN	4
aspV	4
STM0297	4
yebB	4
sopA	4
STM3653	4
yihR	4
yihQ	4
STM1499	4
lyxK	4
dsdX	4
dsdC	4
ccmH	4
STM3834	4
STM3833	4
STM3832	4
safC	4
safA	4
STM4134	4
pspD	3
STM2823	3
ileV	3
STM0354	3
STM0353	3
STM0352.S	3
STM0351	3
STM0350.S	3
rlpA	3
lysW	3
valT	3
STM1557	3
sseJ	3
trg	3
tyrV	3
STM1933	3
asnW	3
STM2011.1n	3
gltW	3
speA	3
STM3154	3
rrfF	3
yhiN	3
rrsE	3
yjeP	3
STM4540.S	3
STM4539	3
STM4538	3
STM4537	3
STM4536	3
STM4535	3
lplA	3
STM0437	3
STM0436A	3
arcC	3
ylbF	3
ylbE	3
allD	3
allC	3
ylbA	3
glxK	3
ybbY	3
allB	3
allP	3
ybbV	3
STM0520	3
glxR	3
gip	3
gcl	3
allR	3
allA	3
ybbS	3
STM1003	3
STM1002	3
STM1001	3
pipA	3
STM1228	3
STM1668	3
STM2225	3
STM2375	3
STM2374	3
STM2534	3
STM2905	3
STM2904	3
ygiW	3
STM3175	3
STM3460	3
glpR	3
STM3907	3
STM3906	3
STM4039	3
aceF	3
STM1676	3
STM3020	3
misL	3
yidZ	3
yieG	3
yieF	3
STM4156	3
treB	3
STM2940	3
livJ	3
yhhK	3
livK	3
STM3654	3
STM3652	3
STM3651	3
STM1498	3
STM1540	3
STM1637	3
STM1632	3
ydbH	3
wcaL	3
yfeN	3
xapA	3
xapB	3
xapR	3
STM2420.1n	3
STM3858	3
sinR	3
ybeJ	3
safD	3
safB	3
STM0298	3
STM1672	3
STM3036	3
STM3031	3
STM3030	3
stdA	3
stdB	3
stdC	3
STM3025	3
STM3025.1N	3
deaD	3
rrfA	3
yiiG	3
STM4057	3
ileU	3
STM0083	3
STM2547	3
STM0412	3
yiaO	3
yiaN	3
yiaM	3
STM3670	3
yiaL	3
yiaK	3
yiaJ	3
ccmB	3
ccmC	3
ccmD	3
ccmE	3
STM2244	3
STM3755.1N	3
STM4450	3
STM4449	3
pspF	2
pspA	2
pspB	2
pspC	2
STM2822	2
STM4054	2
yadH	2
ybcJ	2
glnX	2
orf32	2
STM1530	2
STM1630	2
STM1628	2
STM1627	2
ydcI	2
STM1624	2
tyrT	2
amn	2
cbiC	2
yfgA	2
ygbJ	2
ygbK	2
STM3388	2
malT	2
STM3598	2
STM3601	2
STM3600	2
rrsA	2
STM4186	2
aceK	2
idnD	2
idnO	2
idnT	2
thrW	2
rihA	2
ybeL	2
potF	2
fabF	2
10Sa	2
yheS	2
STM3698	2
STM3697	2
STM3696	2
ilvA	2
uvrA	2
STM4390	2
STM1616	2
slsA	2
yiiL	2
purH	2
purD	2
zraP	2
thiC	2
thiH	2
STM4155	2
rrfB	2
rrsH	2
STM2938	2
ygbF	2
yadI	2
STM1252	2
pps	2
marB	2
ydeD	2
ydeE	2
STM1606	2
ydcN	2
STM1636	2
STM1635	2
STM1634	2
STM1633	2
yedD	2
nuoN	2
alaW	2
yfeJ	2
hemF	2
eutA	2
ygbM	2
STM3799	2
emrD	2
yjgA	2
ugtL	2
STM1600	2
pheR	2
lysZ	2
astA	2
STM1585	2
pduO	2
valY	2
valX	2
yohL	2
sthE	2
STM0084	2
STM0082	2
STM0081	2
STM3773	2
ymfC	2
nhoA	2
pduU	2
pduT	2
malS	2
STM3768	2
ccmA	2
STM0042	2
STM0041	2
nhaR	2
rihC	2
STM0050	2
citG2	2
citX2	2
citF2	2
citE2	2
citD2	2
citC2	2
STM0057	2
STM0056	2
STM0055	2
STM0054	2
STM0053	2
STM0052	2
STM0098	2
STM0162	2
kdgT	2
yacL	2
STM0164	2
pdxA	2
panC	2
fhuA	2
fhuB	2
tilS	2
yafC	2
dkgB	2
aspU	2
STM0257	2
STM0314	2
prfH	2
STM0349	2
STM0348	2
STM0347	2
STM0346	2
STM0345	2
STM0344	2
STM0343	2
STM0342	2
STM0341	2
stbA	2
stbB	2
stbC	2
stbD	2
stbE	2
yahN	2
foxA	2
STM0363	2
STM0362	2
tsx	2
phnX	2
phnW	2
phnR	2
phnS	2
phnT	2
phnU	2
phnV	2
STM0497	2
ybbB	2
STM0509	2
fimW	2
STM0551	2
fimY	2
fimZ	2
fimF	2
fimH	2
STM0560	2
STM05559.T1	2
STM0652	2
STM0651	2
STM0650	2
STM0649.S	2
STM0771	2
STM0770	2
modF	2
STM0777	2
ybhM	2
ybiK	2
STM0869	2
STM1089	2
STM1133	2
STM1132	2
STM1131	2
STM1130	2
STM1129	2
STM1128	2
STM1127	2
pepT	2
STM1239	2
lppB	2
ssaE	2
STM1583	2
STM1675	2
ycjE	2
STM1856	2
STM1857	2
STM1859	2
STM1858	2
amyA	2
pduK	2
wzxC	2
STM2135	2
STM2134	2
STM2133	2
STM2132	2
baeR	2
STM2156A	2
STM2245	2
ccmF	2
ccmG	2
STM2275	2
STM2274	2
STM2273	2
STM2357	2
STM2377	2
pgtA	2
pgtC	2
pgtB	2
eutG	2
xseA	2
yfhC	2
STM2575	2
STM2574	2
STM2573	2
STM2680	2
STM2804	2
STM2803	2
STM2816	2
hycI	2
STM2844	2
sptP	2
STM2908	2
pphB	2
STM2906	2
mazG	2
STM3052	2
STM3075	2
yggM	2
STM3131	2
STM3141	2
STM3142	2
ygiD	2
yqiK	2
STM3198	2
yhcG	2
mdh	2
STM3358	2
STM3357	2
STM3356	2
STM3355	2
STM3354	2
oadG	2
oadA	2
oadB	2
STM3350	2
rrfD	2
thrV	2
yhhY	2
STM3550	2
yhiQ	2
sgbH	2
STM3679	2
STM3678	2
sgbE	2
sgbU	2
mtlA	2
STM3690	2
STM3760	2
marT	2
fidL	2
rmbA	2
STM3778	2
STM3777	2
STM3863	2
ilvY	2
ilvC	2
STM3945	2
STM3944	2
STM3981	2
STM3980	2
mobB	2
cpxA	2
yiiM	2
STM4069	2
STM4068	2
STM4067	2
STM4066	2
STM4065	2
ushB	2
yneA	2
ydeZ	2
ydeY	2
ego	2
ydeW	2
ydeV	2
STM4071	2
STM4070	2
STM4080	2
yneC	2
yneB	2
STM4098	2
yjbN	2
nrfE	2
ytgA	2
yeeN	2
STM4498.1N	2
yjiA	2
yjjA	2
creD	2
artI	2
artQ	2
artM	2
artJ	2
STM4053	1
STM4052	1
citX	1
speF	1
kdpB	1
hpaB	1
ycfS	1
pdxY	1
rspB	1
yneH	1
yneI	1
STM1532	1
STM1531	1
fdnG	1
fdnH	1
fdnI	1
nmpC	1
yddG	1
ydcX	1
narG	1
narH	1
asnU	1
yeeO	1
aegA	1
STM2786	1
STM3098	1
yqgF	1
yqgE	1
gshB	1
acrE	1
envR	1
yheT	1
glpD	1
yhhA	1
dppD	1
dppF	1
yhjW	1
STM4104	1
yjgB	1
idnK	1
yjjX	1
yaeT	1
cyoE	1
STM0580	1
ybdF	1
nfnB	1
apeE	1
pabC	1
yegO	1
yegN	1
corA	1
nrdG	1
STM0563	1
rhlE	1
ydiZ	1
STM1324	1
STM2824	1
rrsC	1
hydG	1
hydH	1
yjaH	1
hupA	1
yjaG	1
nfi	1
hemE	1
nudC	1
rsd	1
thiE	1
thiF	1
STM4161	1
thiG	1
rpoC	1
rpoB	1
rplL	1
rplJ	1
rplA	1
rplK	1
nusG	1
secE	1
tuf	1
thrT	1
glyT	1
tyrU	1
thrU	1
STM4141	1
STM4140	1
coaA	1
birA	1
murB	1
ybgL	1
ybhR	1
serX	1
yadE	1
tesB	1
ybbK	1
aroG	1
STM1251	1
STM1250	1
STM1249	1
osmC	1
ydcF	1
cybB	1
STM1638	1
STM1623	1
cheM	1
STM2126	1
nupC	1
yfhJ	1
xylA	1
STM0037	1
acnB	1
ycbB	1
pdgL	1
STM1671	1
STM4309	1
yaiI	1
aes	1
glnW	1
ycdC	1
ycdY	1
ycdX	1
ycfJ	1
mipA	1
yeaG	1
yeaH	1
yeaJ	1
STM1484	1
ydgE	1
ydgF	1
STM1586	1
srfB	1
STM1667	1
STM1666	1
STM1665	1
STM1843	1
flhB	1
STM2180	1
alaX	1
hycE	1
STM3022	1
rrsD	1
glgB	1
yhjL	1
gltS	1
cigR	1
yidY	1
hemX	1
rhtB	1
STM4478	1
STM4504	1
yjiS	1
STM4520	1
STM4519	1
leuQ	1
leuP	1
leuV	1
ddl	1
prpR	1
ybiF	1
dcp	1
mglB	1
gabT	1
proP	1
pipD	1
STM1093	1
orfX	1
wraB	1
STM1147	1
astB	1
astD	1
STM1538	1
STM1539	1
STM1559	1
STM1558	1
STM1669	1
yhjU	1
yhjT	1
yhjS	1
yhjR	1
yhjQ	1
bcsA	1
yhjN	1
STM3617	1
ysaA	1
avtA	1
yihS	1
bcfD	1
STM0029	1
thiQ	1
leuC	1
pepD	1
phoE	1
thiJ	1
STM0479	1
sfbC	1
sfbB	1
sfbA	1
fimD	1
fimC	1
fimI	1
fimA	1
cobD	1
cobC	1
ybeY	1
glnS	1
tolB	1
STM0799.1N	1
STM0799	1
dinG	1
ybjD	1
ybjZ	1
STM0954	1
STM0972	1
STM0971	1
pflA	1
pipB	1
flgE	1
ycfM	1
ycfW	1
potB	1
sifA	1
STM1236	1
STM1265	1
topB	1
argD	1
ydiU	1
rprA	1
orf70	1
valW	1
ssaU	1
ssaT	1
ssaS	1
ssaR	1
ssaQ	1
ssaP	1
ssaO	1
ssaN	1
ssaV	1
ssaM	1
ssaL	1
ssaK	1
STM1410	1
ssaJ	1
ssaI	1
ssaH	1
ssaG	1
sseG	1
sseF	1
sscB	1
sseE	1
sseD	1
sseC	1
sscA	1
sseB	1
sseA	1
ssaD	1
ssaC	1
ssaB	1
ssrA	1
ssrB	1
smvA	1
ydcZ	1
yncA	1
sifB	1
STM1643	1
STM1673	1
STM1698A	1
STM1698	1
topA	1
trpC	1
STM1741	1
sopE2	1
aspS	1
cspB	1
erfK	1
cobT	1
pduX	1
pduW	1
pduV	1
pduS	1
pduQ	1
pduP	1
pduN	1
pduM	1
pduL	1
pduJ	1
pduH	1
pduG	1
pduE	1
pduD	1
pduC	1
pudB	1
pduA	1
pduF	1
pocR	1
cbiA	1
cbiD	1
cbiE	1
cbiT	1
cbiF	1
cbiG	1
cbiH	1
cbiJ	1
cbiK	1
cbiL	1
cbiM	1
cbiN	1
cbiQ	1
cbiO	1
cbiP	1
cobU	1
cobS	1
STM2139	1
STM2138	1
STM2139.2n	1
stcA	1
yehS	1
STM2209	1
STM2208	1
yeiP	1
sseL	1
STM2361	1
STM2360	1
STM2359	1
STM2358	1
STM2373	1
STM2376	1
pgtP	1
glk	1
zipA	1
cysA	1
maeB	1
eutS	1
eutP	1
eutQ	1
eutT	1
eutD	1
eutM	1
eutN	1
eutE	1
eutJ	1
eutH	1
eutB	1
eutC	1
eutL	1
eutK	1
eutR	1
STM2532	1
rrsG	1
rrfG	1
tyrA	1
yfiN	1
pipB2	1
STM2779	1
STM2778	1
iroN	1
iroE	1
iroD	1
iroC	1
iroB	1
mig-14	1
virK	1
luxS	1
hypF	1
sipD	1
sipC	1
invA	1
STM2910	1
iap	1
STM2959	1
fucR	1
fucU	1
fucK	1
fucI	1
fucP	1
fucA	1
fucO	1
xerD	1
yggE	1
STM3129	1
STM3128	1
STM3127	1
STM3126	1
STM3125	1
STM3124	1
STM3130	1
STM3138	1
sufI	1
yqjH	1
tdcD	1
yraR	1
yhbV	1
argG	1
hflB	1
yrbB	1
yrbL	1
arcB	1
gntT	1
glpG	1
nikR	1
STM3624.1N	1
STM3624A	1
aldB	1
rfaZ	1
STM3794	1
STM3793	1
STM3792	1
STM3791	1
dsdA	1
dnaA	1
rep	1
wecF	1
recQ	1
STM3966	1
metE	1
yiiD	1
fdhD	1
tpiA	1
glpK	1
yjaB	1
STM4191	1
lysC	1
STM4259	1
STM4260	1
nrfA	1
nrfD	1
nrfC	1
nrfB	1
nrfG	1
STM4351	1
ytfL	1
STM4465	1
STM4509.S	1
yaaI	1
htgA	1
STM0019	1
caiE	1
caiF	1
yabF	1
hemL	1
yafE	1
prpD	1
yaiV	1
queA	1
yajO	1
ybaL	1
glnV	1
STM0692	1
STM0691	1
citB	1
abrB	1
nei	1
ycaL	1
ycaQ	1
STM1082	1
STM1081	1
csgD	1
csgE	1
csgF	1
csgA	1
aadA	1
STM1287	1
katE	1
STM1368	1
orf48	1
orf408	1
orf245	1
STM1472	1
tqsA	1
STM1527	1
STM1529	1
STM1528	1
STM1535	1
STM1534	1
ansP	1
yddE	1
narV	1
narW	1
narY	1
narZ	1
narU	1
STM1612	1
STM1621	1
STM1619	1
STM1618	1
STM1617	1
STM1615	1
STM1614	1
STM1613	1
STM1674	1
STM1678	1
STM1677	1
yciW	1
yciR	1
yciT	1
ruvB	1
ompS	1
hisG	1
cpsG	1
wcaJ	1
wcaK	1
wcaM	1
galF	1
manC	1
yegB	1
yegT	1
yegV	1
yegU	1
yehR	1
STM2179	1
STM2178	1
STM2177	1
STM2176	1
STM2175	1
yeiA	1
STM2186	1
napH	1
STM2300	1
yfbG	1
pmrF	1
yfbE	1
STM2302	1
STM2400	1
yfeR	1
STM2478	1
sinI	1
STM2570	1
yfhH	1
yfiK	1
yfiE	1
grpE	1
STM2804.1n	1
hypE	1
sipA	1
ygbL	1
STM2914	1
STM2913	1
STM2950	1
lysA	1
STM3012	1
bglA	1
gsp	1
ygiR	1
parE	1
ygiH	1
ygjQ	1
ygjP	1
yqjB	1
yqjG	1
STM3257	1
garD	1
STM3262	1
STM3261	1
STM3260	1
STM3259	1
STM3258	1
yhfL	1
STM3508	1
gntU	1
yhgN	1
yhhW	1
ggt	1
STM3549	1
STM3548	1
STM3547.Sc	1
ftsY	1
yhhS	1
yhiI	1
yhiH	1
yhhJ	1
yhjV	1
STM3633	1
STM3632	1
STM3631	1
yiaE	1
rfaK	1
rfaB	1
yicI	1
yicH	1
nepI	1
STM3775	1
STM3774	1
STM3772	1
STM3771	1
STM3770	1
STM3769.S	1
STM3767	1
STM3766	1
yicL	1
yidE	1
STM3806	1
torS	1
yieH	1
glmS	1
glnA	1
yihP	1
yihO	1
STM4041	1
STM4051	1
STM4097	1
STM4103	1
STM4257	1
yjcC	1
yjcB	1
STM4270	1
lpxO	1
melB	1
STM4314	1
STM4316	1
yjfL	1
yjfK	1
yjfJ	1
yjfC	1
yjfM	1
STM4413	1
STM4412	1
STM4441	1
STM4448	1
STM4447	1
STM4446	1
STM4445	1
STM4444	1
STM4443	1
treC	1
yjgK	1
yjgM	1
yjgN	1
idnR	1
STM4502	1
STM4501	1
yjhP	1
trpS2	1
dnaC	1
rsmC	1
deoD	1
creC	1
STM4597	1
STM4596	1
STM4595	1
sthA	1
sthB	1
sthD	1
ybjP	1
artP	1
STM0886	1
STM0885	1
ulaA	1
rumB	1
ybjO	1
potI	1
potH	1
potG	1
ybjN	1
rimK	1
mdaA	1
ybjC	1
grxA	1
ybjM	1
STM0870	1
STM0868	1
STM0867	1
mdfA	1
ybjG	1
deoR	1
dacC	1
yliJ	1
STM3167	1
livF	1
