# Supplementary material for: Genome-Wide Detection of Spontaneous Chromosomal Rearrangements in Bacteria
Source: PLoS One. 2012 Aug 3;7(8):e42639. doi: 10.1371/journal.pone.0042639 (PMC3411829; doi:10.1371/journal.pone.0042639)
Supplement: Table S3 — List of genes included in identified deletions and the times being found deleted in genome comparison study between S. typhimirum and other Salmonella subspecies/serovars. (XLS) [file pone.0042639.s006.xls]

## Sheet: Sheet1
Table S3. List of genes included in identified deletions and the times being found deleted in genome comparison study between S. typhimurium and other Salmonella subspecies/serovars.
Dataset	Read Name	Deleted Genes	Observations in comparative study
Gen48
	GFLSN1V01ATM5V	STM4213	9
	GFLSN1V01CDFB9	glK	1
	GFLSN1V01DNN3C	modE	0
	GFLSN1V01DJLGX	STM3767	1
		STM3768	2
	GFLSN1V01DOBJK	malP	0
	GFLSN1V02GKAGX	rpsA	0
	GFLSN1V02H9636	purD	2
	GFLSN1V02JBE7P	ratA	4
	GFLSN1V01BZFPJ	rhlE	1
	GFLSN1V01EEKH4	carB	0
	GFLSN1V02HCA7P	STM0283	6
	GFLSN1V01AK6D5	STM4261	8
	GFLSN1V02FLAH5	shdA	14
	GFLSN1V01E0QZI	yhiH	1
	GFLSN1V01DJFOY	ratB	5
	GFLSN1V01A7KE5	STM2534	3
	GFLSN1V01E44E9	aceF	3
	GFLSN1V01CSMWY	STM4261	8
	GFLSN1V01AUOOQ	aceF	3
	GFLSN1V02FX6DH	STM0292	13
		STM0293	12
		STM0294	12
	GFLSN1V02JG15X	lysW	3
		valT	3
	GFLSN1V02GV9LY	STM2823	3
	GFLSN1V01B9VTY	metZ	0
	GFLSN1V02JJGI4	STM3691	13
	GFLSN1V01C22ZK	STM4261	8
Gen144
	GFLSN1V01EUBRC	tolA	14
	GFLSN1V02HJVJW	ybiH	0
		STM0818	0
	GFLSN1V01CQCBJ	malP	0
	GFLSN1V02J1EY1	yiaN	3
	GFLSN1V01CBOOP	ratA	4
	GFLSN1V01AJ9N7	shdA	14
	GFLSN1V01DHYJ1	uvrA	2
	GFLSN1V01CPT7F	yheS	2
	GFLSN1V02I19M7	STM4261	8
	GFLSN1V01DV19P	aceF	3
	GFLSN1V01D5XF7	lysW	3
		valT	3
	GFLSN1V02I49QM	glyY	4
		glyX	4
Gen240
	GFLSN1V01CTLYT	STM1012	13
	GFLSN1V02FXLSF	gppA	0
		rhlB	0
	GFLSN1V02IQHRK	STM3691	13
	GFLSN1V02G482J	intergenic region	0
	GFLSN1V02GE20L	STM2823	3
	GFLSN1V01BI41E	intergenic region	0
