# Supplementary material for: Genome-Wide Detection of Spontaneous Chromosomal Rearrangements in Bacteria
Source: PLoS One. 2012 Aug 3;7(8):e42639. doi: 10.1371/journal.pone.0042639 (PMC3411829; doi:10.1371/journal.pone.0042639)
Supplement: Table S4 — List of expected true rearrangements based on experimental verification result and their breakpoints. (XLSX) [file pone.0042639.s007.xlsx]

## Sheet: threedatasets_allputativerearra
Table S4. List of expected true rearrangements based on experimental verification result and their breakpoints.
Read Name	Dataset	Classification	Breakpoint1	Breakpoint2	Junction Homology(bp)
GFLSN1V01EMQ0S	gen48	inversion	4504709	4702873	12
GFLSN1V02ITBVM	gen48	inversion	3454416	454286	12
GFLSN1V02F0THC	gen48	inversion	208117	3976879	12
GFLSN1V02ISH76	gen48	inversion	413101	746353	13
GFLSN1V02HOFOR	gen48	inversion	4503884	4359706	13
GFLSN1V02HN5N1	gen48	inversion	2246676	3304932	13
GFLSN1V01ERSUA	gen48	inversion	3627875	3340600	14
GFLSN1V02HR39L	gen48	inversion	4520624	1086085	14
GFLSN1V02J57RN	gen48	inversion	3469030	4414553	15
GFLSN1V02H11P7	gen48	inversion	4187580	4185097	15
GFLSN1V02GSR9L	gen48	inversion	4724569	3207944	18
GFLSN1V01CBH8U	gen48	duplication	2787963	3962438	11
GFLSN1V01DTGOJ	gen48	duplication	239282	527868	11
GFLSN1V02GGW6W	gen48	duplication	2396697	4555639	11
GFLSN1V02IGVNQ	gen48	duplication	517657	1946227	11
GFLSN1V02IGMQT	gen48	duplication	4725127	4261652	13
GFLSN1V02HDBTO	gen48	duplication	3858593	3939063	13
GFLSN1V02GU4TO	gen48	duplication	1447890	519373	14
GFLSN1V02IPGBJ	gen48	duplication	4227897	696755	14
GFLSN1V01AYJSO	gen48	duplication	1940880	2200364	15
GFLSN1V02FS66Y	gen48	duplication	4186264	1892071	16
GFLSN1V02JRTIW	gen48	duplication	3336889	92075	17
GFLSN1V02IASJO	gen48	duplication	1198756	3918194	27
GFLSN1V01ATM5V	gen48	deletion	4434315	4434041	8
GFLSN1V01CDFB9	gen48	deletion	2518562	2518197	8
GFLSN1V01DNN3C	gen48	deletion	845002	844596	9
GFLSN1V01DJLGX	gen48	deletion	3969264	3968260	11
GFLSN1V01DOBJK	gen48	deletion	3674934	3674908	12
GFLSN1V02GKAGX	gen48	deletion	1066705	1066955	12
GFLSN1V02H9636	gen48	deletion	4391619	4391241	13
GFLSN1V02JBE7P	gen48	deletion	2645402	2646114	15
GFLSN1V01BZFPJ	gen48	deletion	886477	885981	15
GFLSN1V01EEKH4	gen48	deletion	78669	79122	16
GFLSN1V02HCA7P	gen48	deletion	323023	322718	17
GFLSN1V01AK6D5	gen48	deletion	4489365	4490253	19
GFLSN1V02FLAH5	gen48	deletion	2629998	2629346	24
GFLSN1V01E0QZI	gen48	deletion	3754425	3755179	28
GFLSN1V01DJFOY	gen48	deletion	2637406	2636531	32
GFLSN1V01A7KE5	gen48	deletion	2674679	2673807	44
GFLSN1V01E44E9	gen48	deletion	179054	179617	50
GFLSN1V01CSMWY	gen48	deletion	4486821	4486276	53
GFLSN1V01AUOOQ	gen48	deletion	179041	179288	63
GFLSN1V02FX6DH	gen48	deletion	337442	339784	64
GFLSN1V02JG15X	gen48	deletion	819064	818855	78
GFLSN1V02GV9LY	gen48	deletion	2970274	2970335	79
GFLSN1V01B9VTY	gen48	deletion	3141141	3141165	83
GFLSN1V02JJGI4	gen48	deletion	3883660	3883275	102
GFLSN1V01C22ZK	gen48	deletion	4489332	4489755	178
GFLSN1V01DEUJP	gen240	inversion	3815649	4158934	11
GFLSN1V01AF6DT	gen240	inversion	1271991	4609237	11
GFLSN1V01E280V	gen240	inversion	4152064	1142228	12
GFLSN1V02HADFA	gen240	inversion	1156773	1028634	15
GFLSN1V01D03J1	gen240	duplication	747832	989456	12
GFLSN1V02HEX9C	gen240	duplication	285177	2651049	13
GFLSN1V02GQP38	gen240	duplication	2777038	2728534	14
GFLSN1V01CTLYT	gen240	deletion	1105457	1105511	10
GFLSN1V02FXLSF	gen240	deletion	4122928	4124120	11
GFLSN1V02IQHRK	gen240	deletion	3883688	3883275	73
GFLSN1V02G482J	gen240	deletion	1853018	1853448	94
GFLSN1V02GE20L	gen240	deletion	2970335	2970295	100
GFLSN1V01BI41E	gen240	deletion	3414232	3414345	122
GFLSN1V02J6UMF	gen144	inversion	4092972	101984	11
GFLSN1V02F5YWK	gen144	inversion	4346936	4389743	11
GFLSN1V02JW4GF	gen144	inversion	3156241	2644331	11
GFLSN1V01DNZTX	gen144	inversion	4514781	1232221	12
GFLSN1V02H66GB	gen144	inversion	1657783	4349275	12
GFLSN1V01BV6H4	gen144	inversion	2368026	2316436	15
GFLSN1V02J5SNE	gen144	inversion	572927	572927	20
GFLSN1V01CPXV3	gen144	duplication	4674717	267595	11
GFLSN1V01C84DY	gen144	duplication	2610786	1819560	11
GFLSN1V01DBM0Z	gen144	duplication	2073508	2060485	12
GFLSN1V01DCAM8	gen144	duplication	453970	982287	12
GFLSN1V01BNVLK	gen144	duplication	2630046	1504938	12
GFLSN1V02GKDWD	gen144	duplication	987525	4164586	13
GFLSN1V01B2NCB	gen144	duplication	1547770	903825	14
GFLSN1V01ANSB6	gen144	duplication	848486	1178171	14
GFLSN1V01CD34M	gen144	duplication	4650088	367251	15
GFLSN1V01BF1IB	gen144	duplication	393384	2752579	15
GFLSN1V01ELXD4	gen144	duplication	2660794	4779696	18
GFLSN1V01C9T7N	gen144	duplication	1483352	3316866	25
GFLSN1V02FIWSU	gen144	duplication	2777025	2728572	39
GFLSN1V01EYGZP	gen144	duplication	1690895	2513637	50
GFLSN1V01CI2NI	gen144	duplication	815338	815382	90
GFLSN1V01EUBRC	gen144	deletion	815043	815501	9
GFLSN1V02HJVJW	gen144	deletion	884431	885315	10
GFLSN1V01CQCBJ	gen144	deletion	3674934	3674908	12
GFLSN1V02J1EY1	gen144	deletion	3859043	3859407	12
GFLSN1V01CBOOP	gen144	deletion	2645649	2644880	21
GFLSN1V01AJ9N7	gen144	deletion	2629998	2629346	24
GFLSN1V01DHYJ1	gen144	deletion	4474558	4473554	26
GFLSN1V01CPT7F	gen144	deletion	3610377	3611190	31
GFLSN1V02I19M7	gen144	deletion	4489895	4489332	38
GFLSN1V01DV19P	gen144	deletion	179041	179288	62
GFLSN1V01D5XF7	gen144	deletion	819064	818855	78
GFLSN1V02I49QM	gen144	deletion	4596883	4596496	78
